# Supplementary material for: High-resolution ultrasound and speckle tracking: a non-invasive approach to assess in vivo gastrointestinal motility during development
Source: Oxford University Press journal article supplement (doi:10.1242/dev.200625), 2022-08-01
Supplement: dev200625supp.pdf [file dev200625supp.pdf]

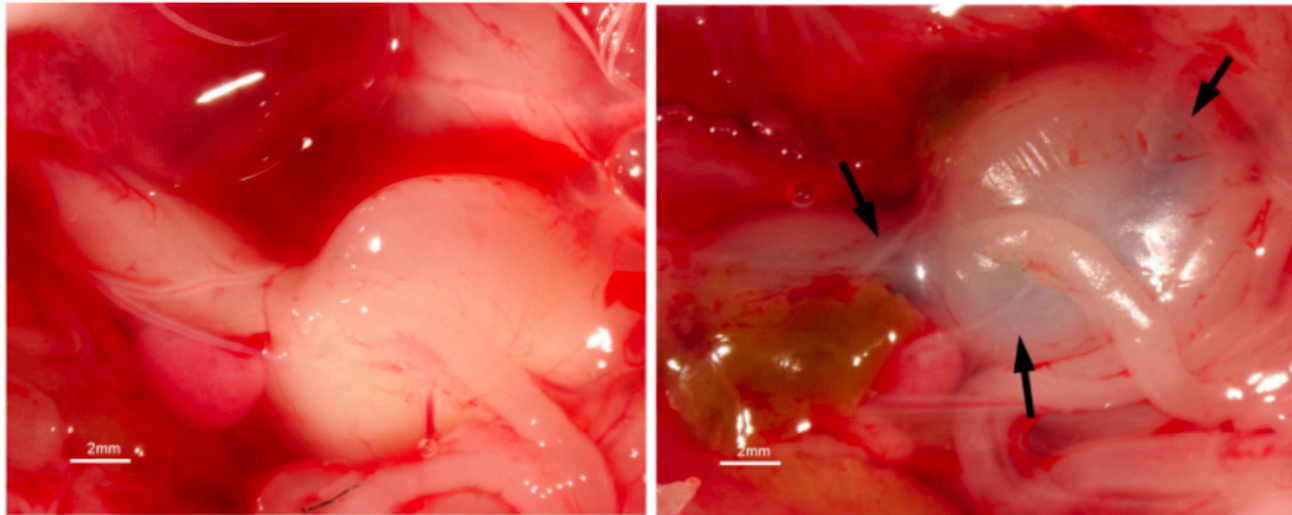

**E15 Control stomach**

**E15 Evans Blue injection  
stomach after 1 hour**

**Fig. S1. Intra-oral administration of Evans Blue solution.** After opening a small window in the extraembryonic membranes close to the head, the solution was deposited directly in the E15 chick embryo beak with a capillary pipette and the egg returned to the 38°C incubator. One hour later, the whole GI tract was dissected and the dye was observed in the stomach lumen (black arrows).

**A**

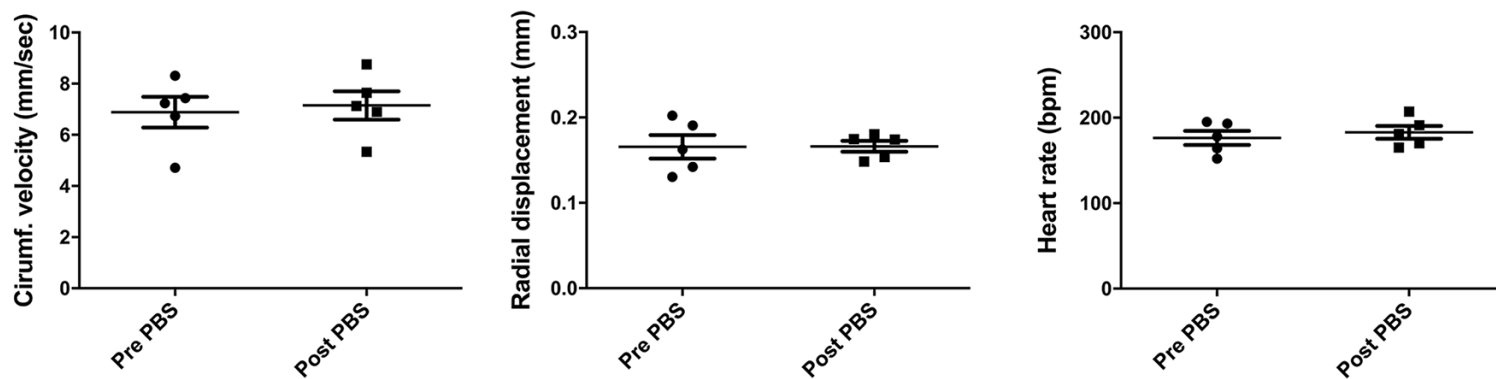

**B**

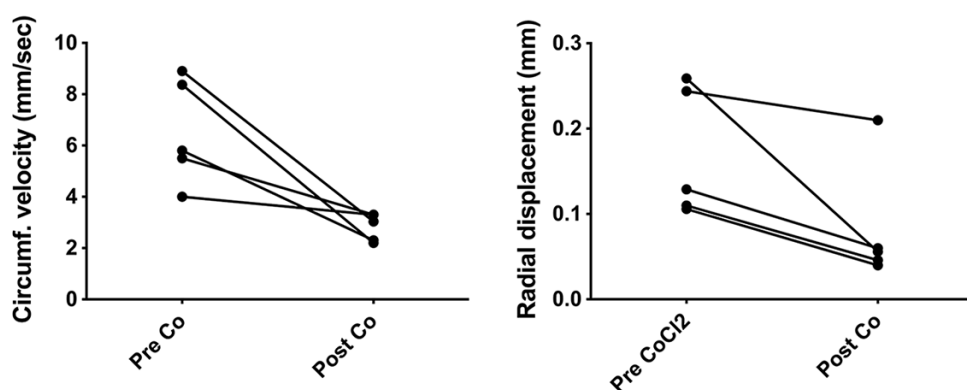

**C**

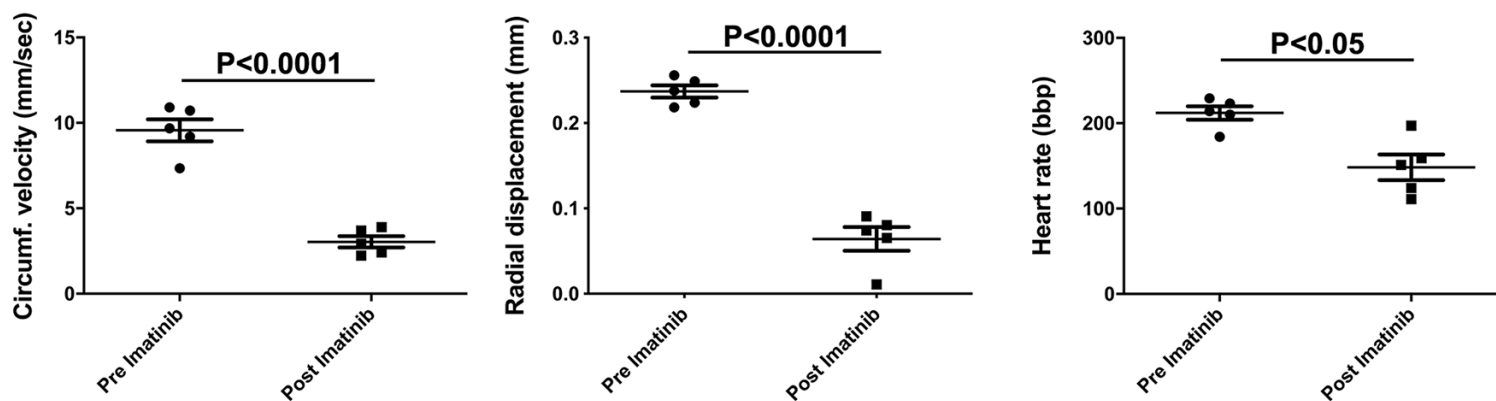

**D**

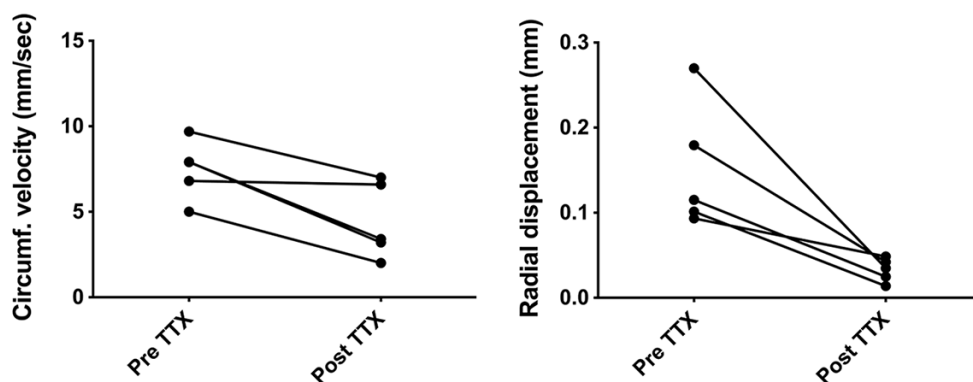

**Fig. S2. Impact of intra-oral administration of PBS and drugs on stomach motility.** (A) Evaluation of the impact of intra-oral administration of PBS (negative control), compared to untreated, on the stomach circumferential strain velocity, stomach radial strain changes, and heart rate in E15 chick embryos (n=5). PBS administration did not alter the stomach circumferential velocity (from  $6.88 \pm 0.92$  mm/sec before to  $7.15 \pm 0.83$  mm/sec after PBS administration, not significant) and radial displacement (from  $0.165 \pm 0.02$  mm before to  $0.166 \pm 0.012$  mm after treatment, not significant) and the heart rate ( $176.4 \pm 14.7$  bpm before and  $182.8 \pm 12.9$  bpm after treatment, not significant). (B) Changes of circumferential strain velocity and radial strain in individual stomachs before and after Cobalt Chloride (CoCl<sub>2</sub>) administration in E15 chick embryos (n=5). (C) Impact of imatinib (20  $\mu$ M) on stomach circumferential strain velocity, stomach radial strain changes, and heart rate in E15 chick embryos (n=5). (D) Changes of circumferential strain velocity and radial strain in individual stomachs before and after tetrodotoxin (TTX) administration in E15 chick embryos (n=5).

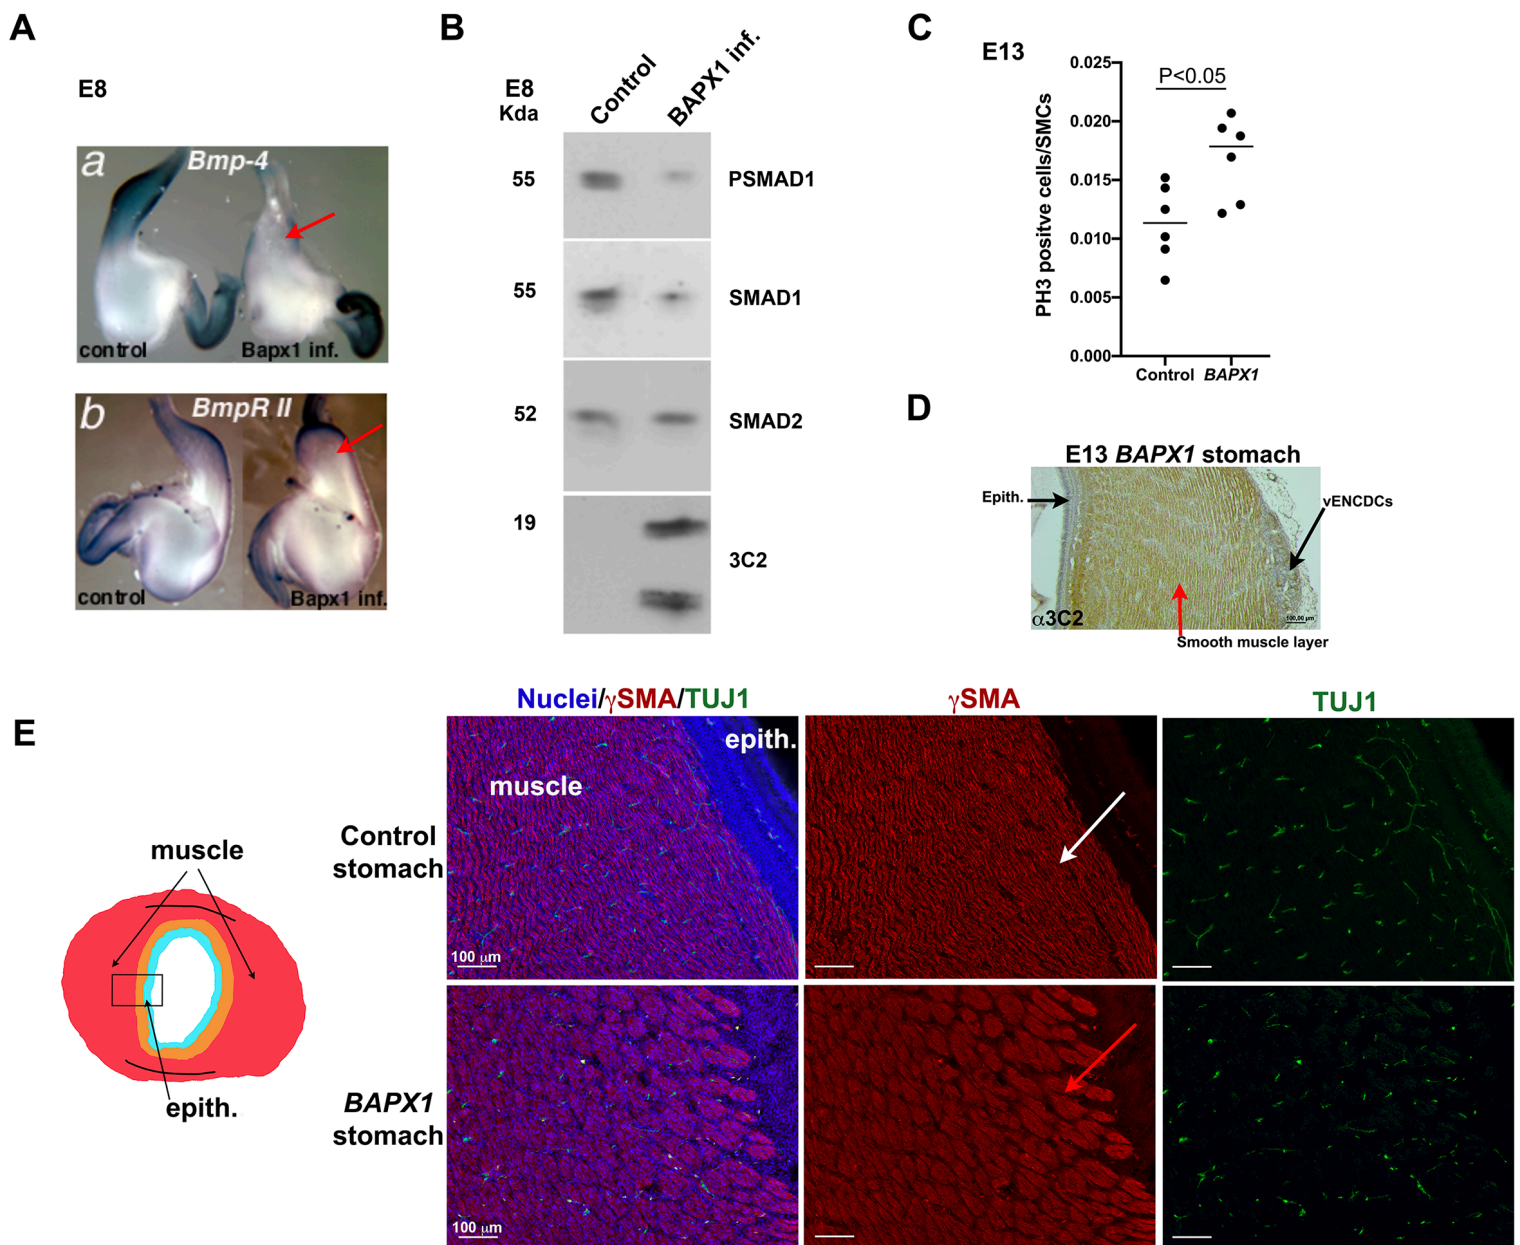

**Fig. S3. Inhibition of BMP signaling activation in *BAPX1*-overexpressing stomach.** (A) *In situ* hybridization analysis of whole-mount E8 stomach overexpressing *BAPX1* demonstrated that *BAPX1* leads to *BMP4* and *BMPRII* mRNA inhibition (red arrows in panels a, b). (B) Western blot analysis of protein extracts from E8 stomach overexpressing *BAPX1* showed inhibition of PSMAD1/5/8 (namely PSMAD1) and SMAD1 expression. (C) Quantification of PH3-positive cells in Control and the *BAPX1*-overexpressing stomach smooth muscle layer at E13. Proliferation rates were assessed by counting the number of PH3-positive cells relative to the total number of  $\alpha$ SMA-positive nuclei in the section. Six control stomachs and six *BAPX1*-overexpressing stomachs were analyzed. One slide for each stomach was analyzed. \* $P < 0.05$  (Student's *t*-test). Mean ratio of PH3-positive cells/SMCs was 0.01130 (for Control) and 0.01681 (for *BAPX1*). Error bars indicate s.e.m. (D) Transversal paraffin sections of E13 *BAPX1*-expressing stomach analyzed by immunohistochemistry with an anti-gag (3C2) antibody. Red arrow indicates the presence of retroviral infection in the smooth muscle layer and black arrows its absence in the stomach epithelial layer and vENCDCs. Scale bars: 100  $\mu$ m. (E) Transversal paraffin sections of E13 *BAPX1*-expressing and Control stomachs close to the epithelium (box drawn in the left panel). Nuclei were visualized with Hoechst. Antibodies against smooth muscle cells ( $\gamma$ SMA), and neuronal cells (TUJ1) were used. Scale bars, 100  $\mu$ m.

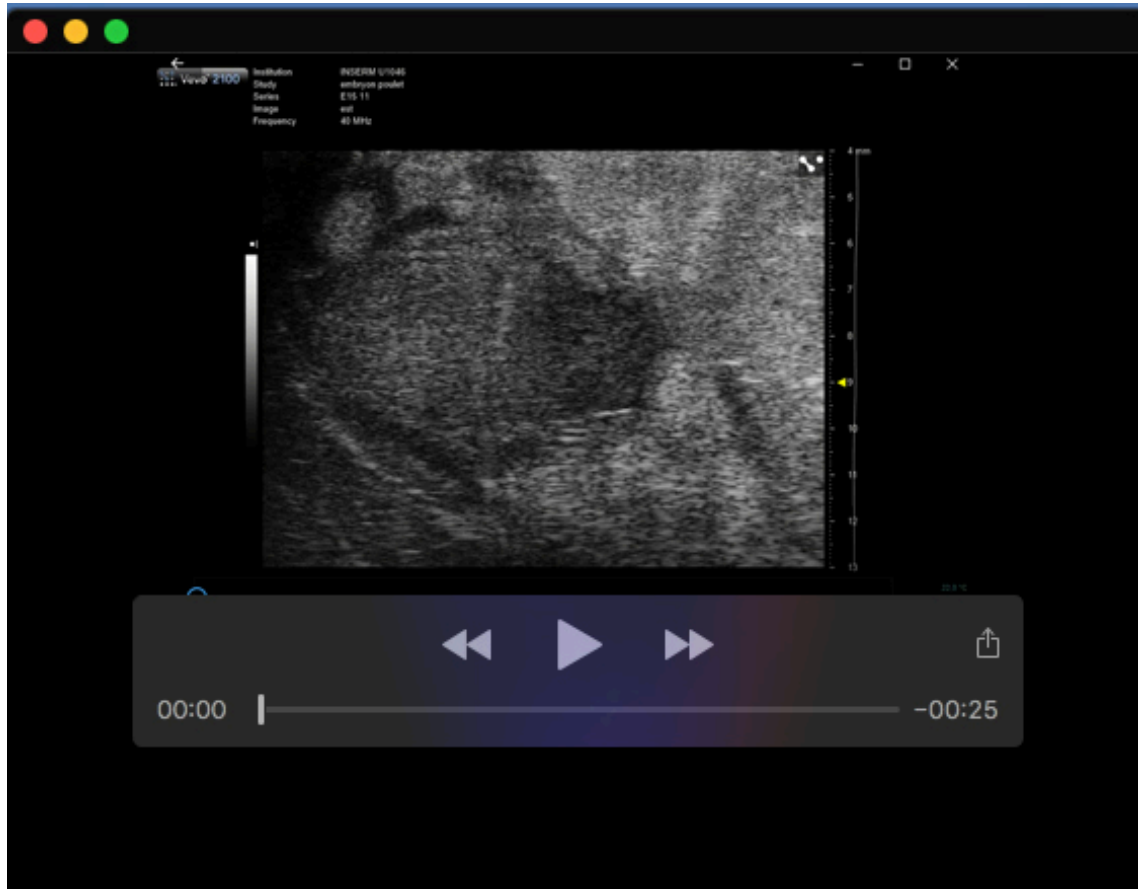

**Movie 1.** Movie obtained using the Vevo2100 ultrasound system to visualize stomach motility at E15.

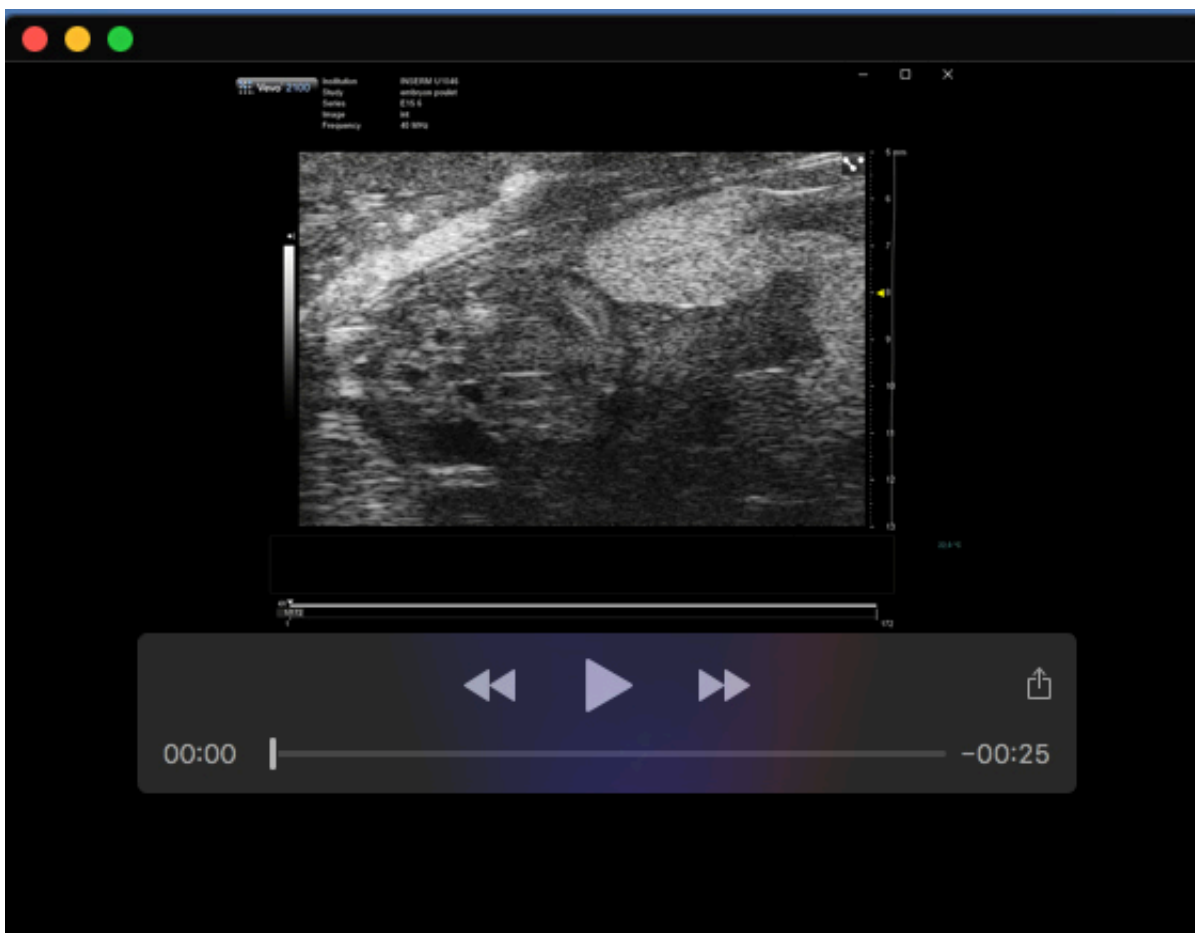

**Movie 2.** Movie obtained using the Vevo2100 ultrasound system to visualize small intestine motility at E15.

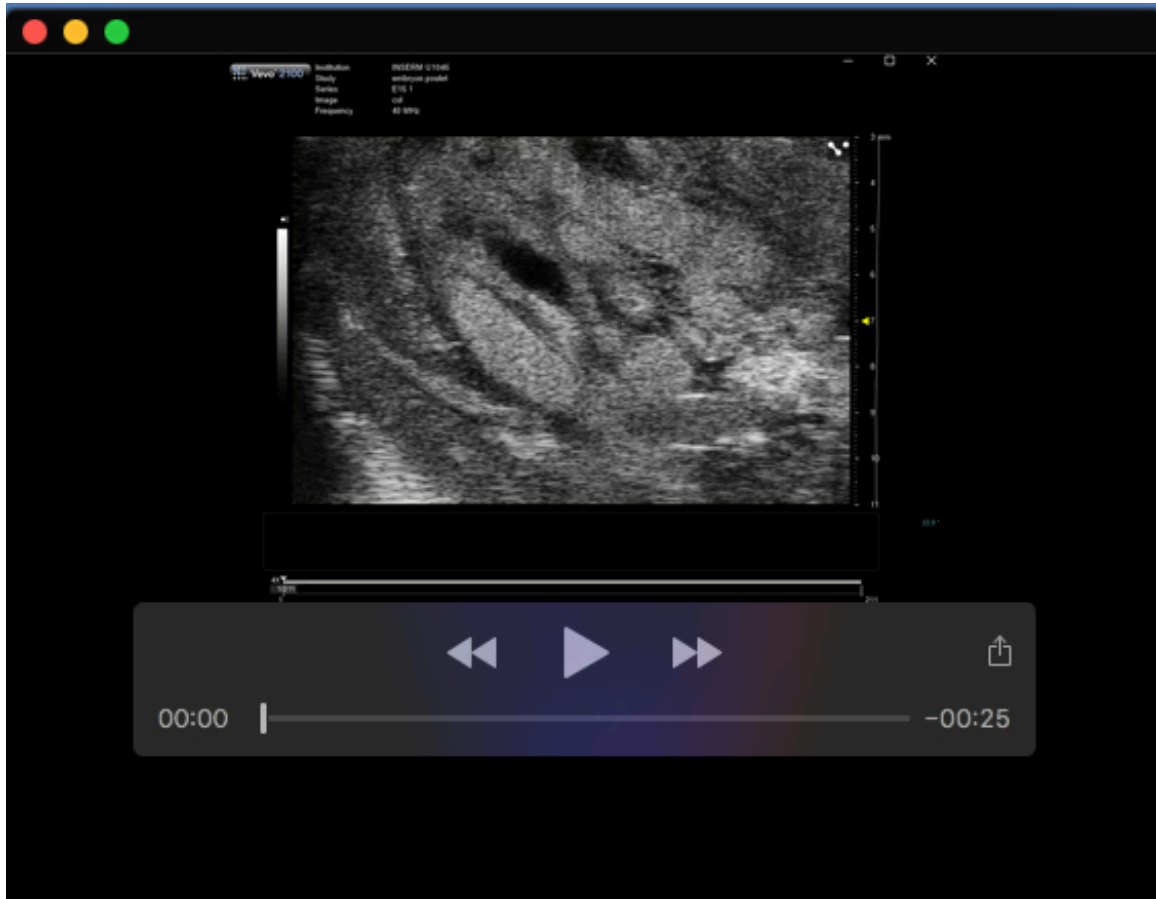

**Movie 3.** Movie obtained using the Vevo2100 ultrasound system to visualize colon motility at E15.

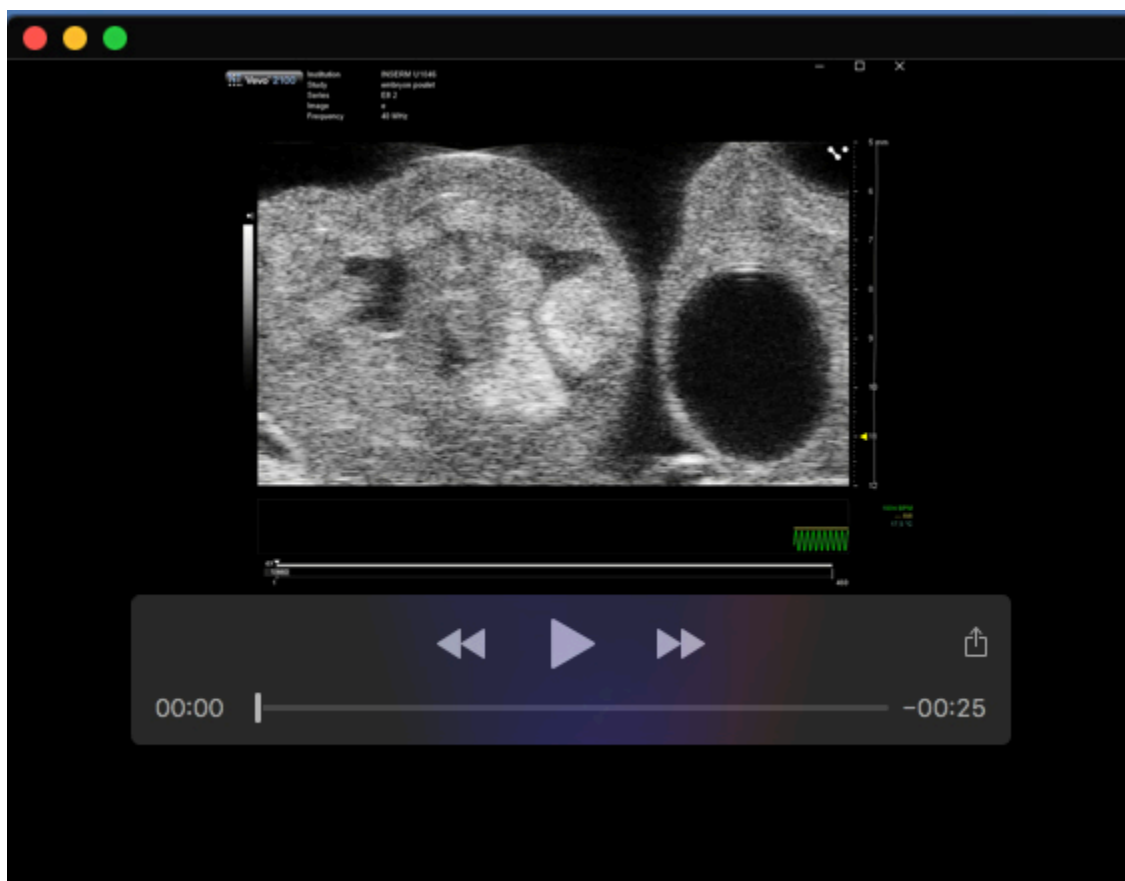

**Movie 4.** Movie obtained using the Vevo2100 ultrasound system to visualize stomach motility at E8.

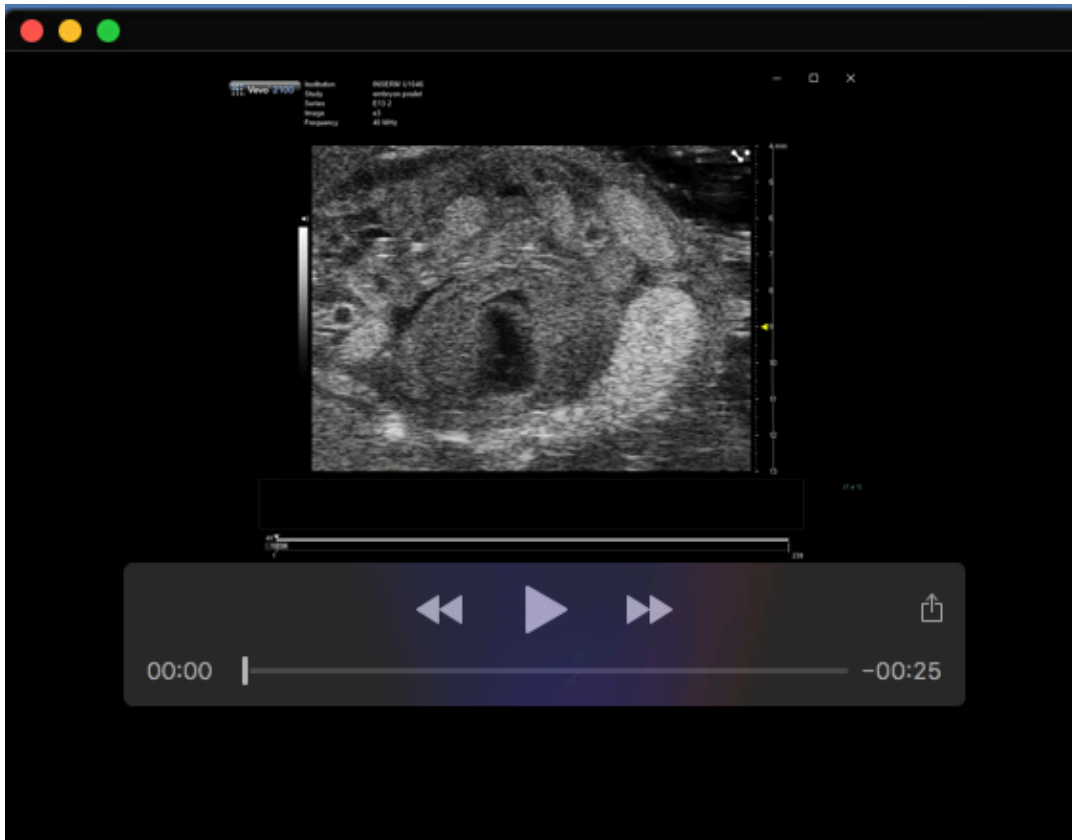

**Movie 5.** Movie obtained using the Vevo2100 ultrasound system to visualize stomach motility at E13.

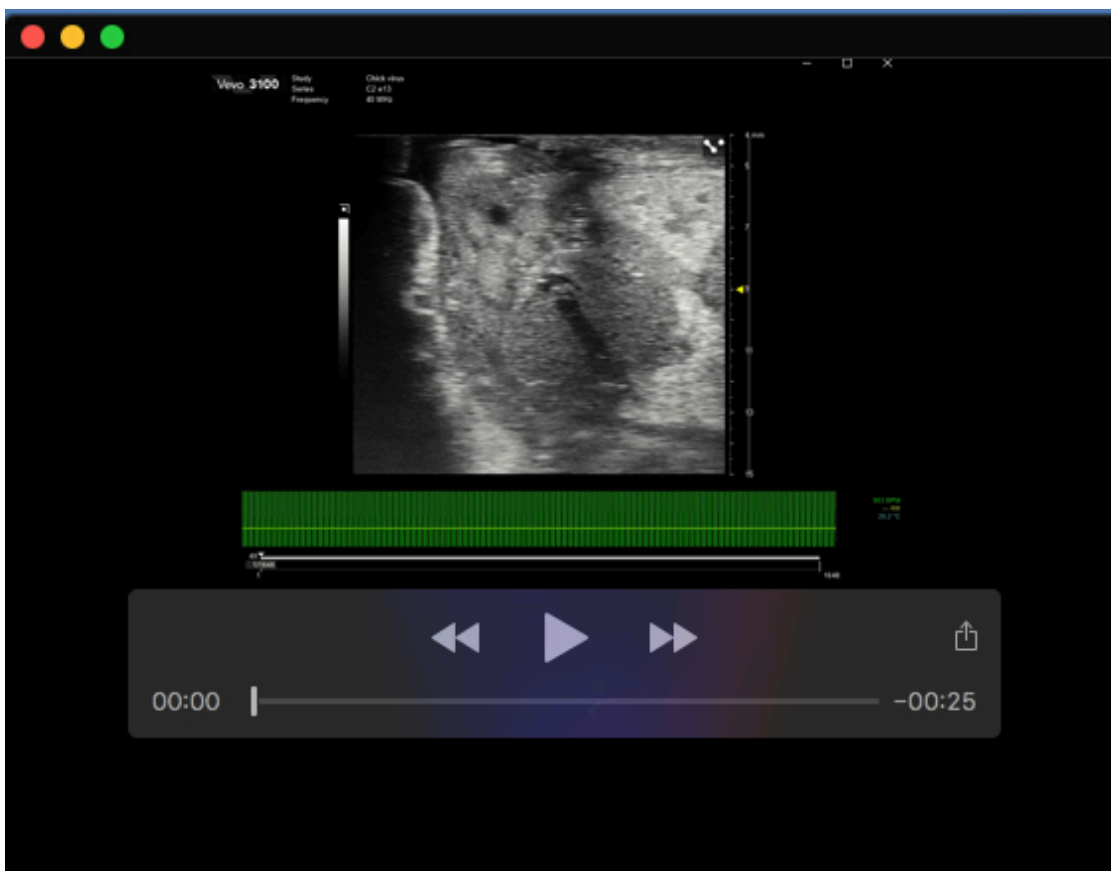

**Movie 6.** Movie obtained using the Vevo3100 ultrasound system to visualize stomach motility of E13 Control-stomach.



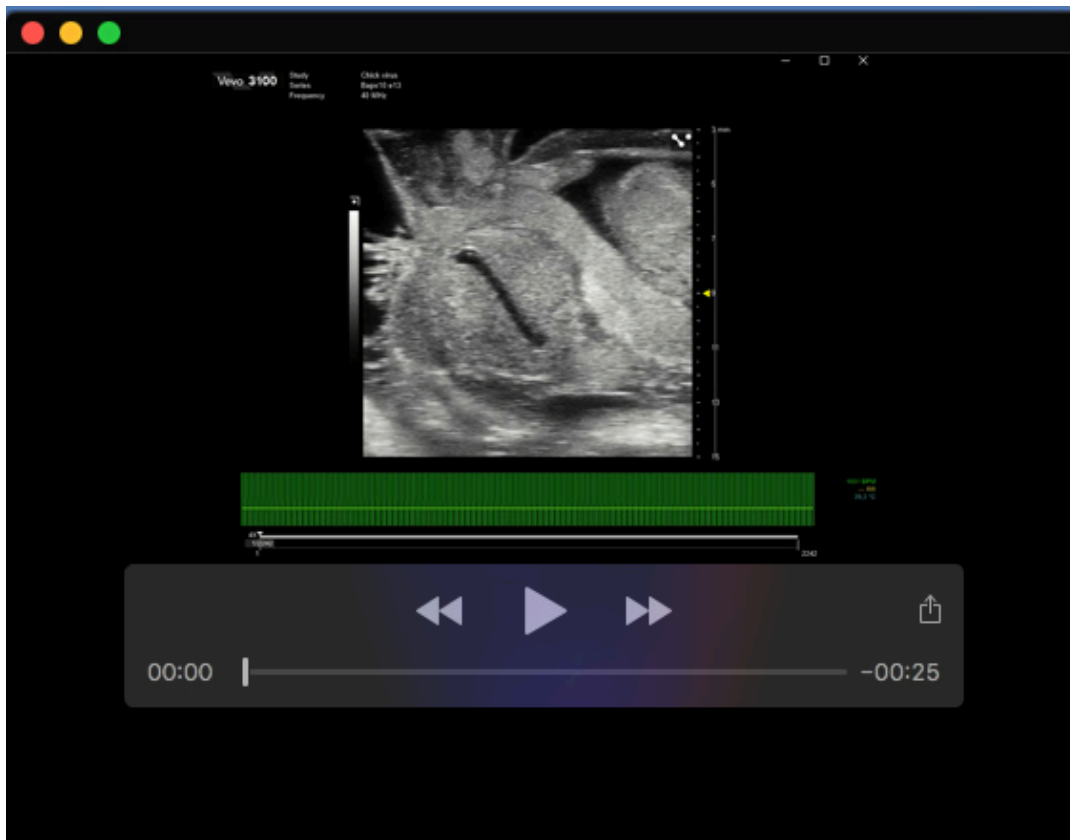

**Movie 7.** Movie obtained using the Vevo3100 ultrasound system to visualize stomach motility of E13 *BAPXI*-overexpressing stomach.

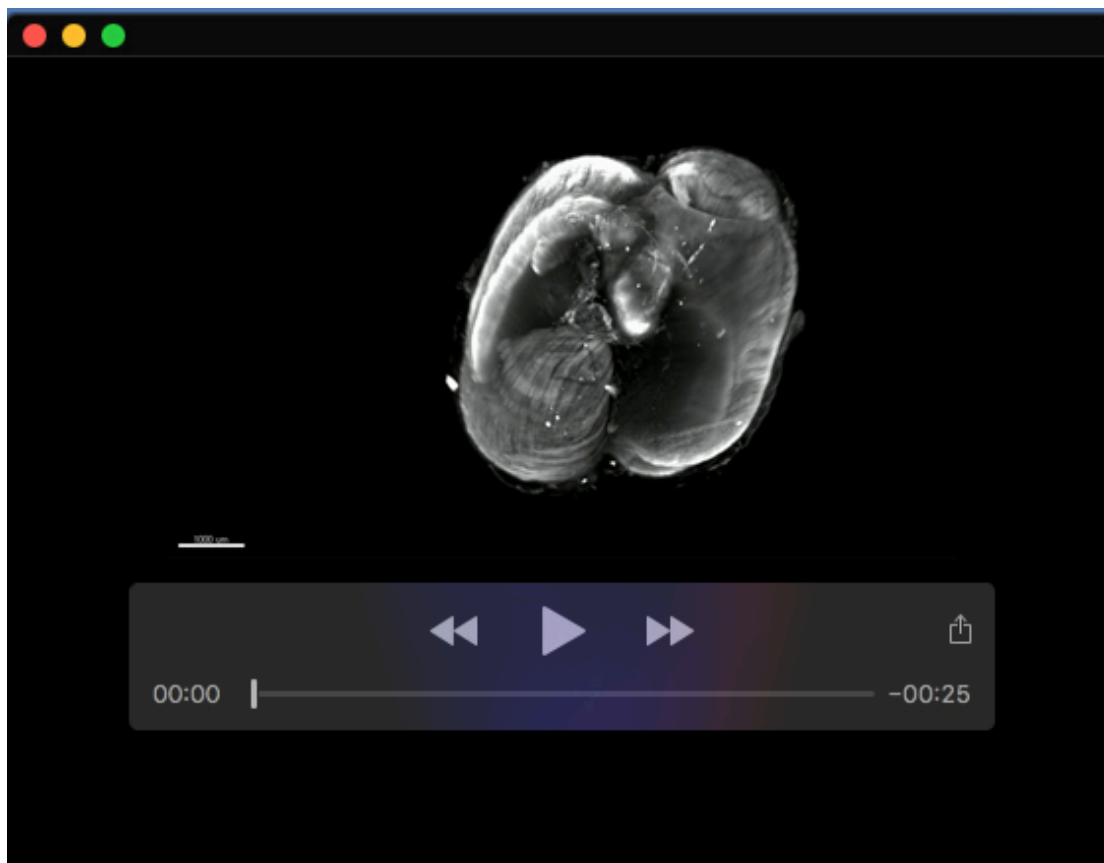

**Movie 8.** 3D Control stomach smooth muscle and ENS imaging at E13 using  $\gamma$ SMA and TUJ1 immunofluorescence analysis.

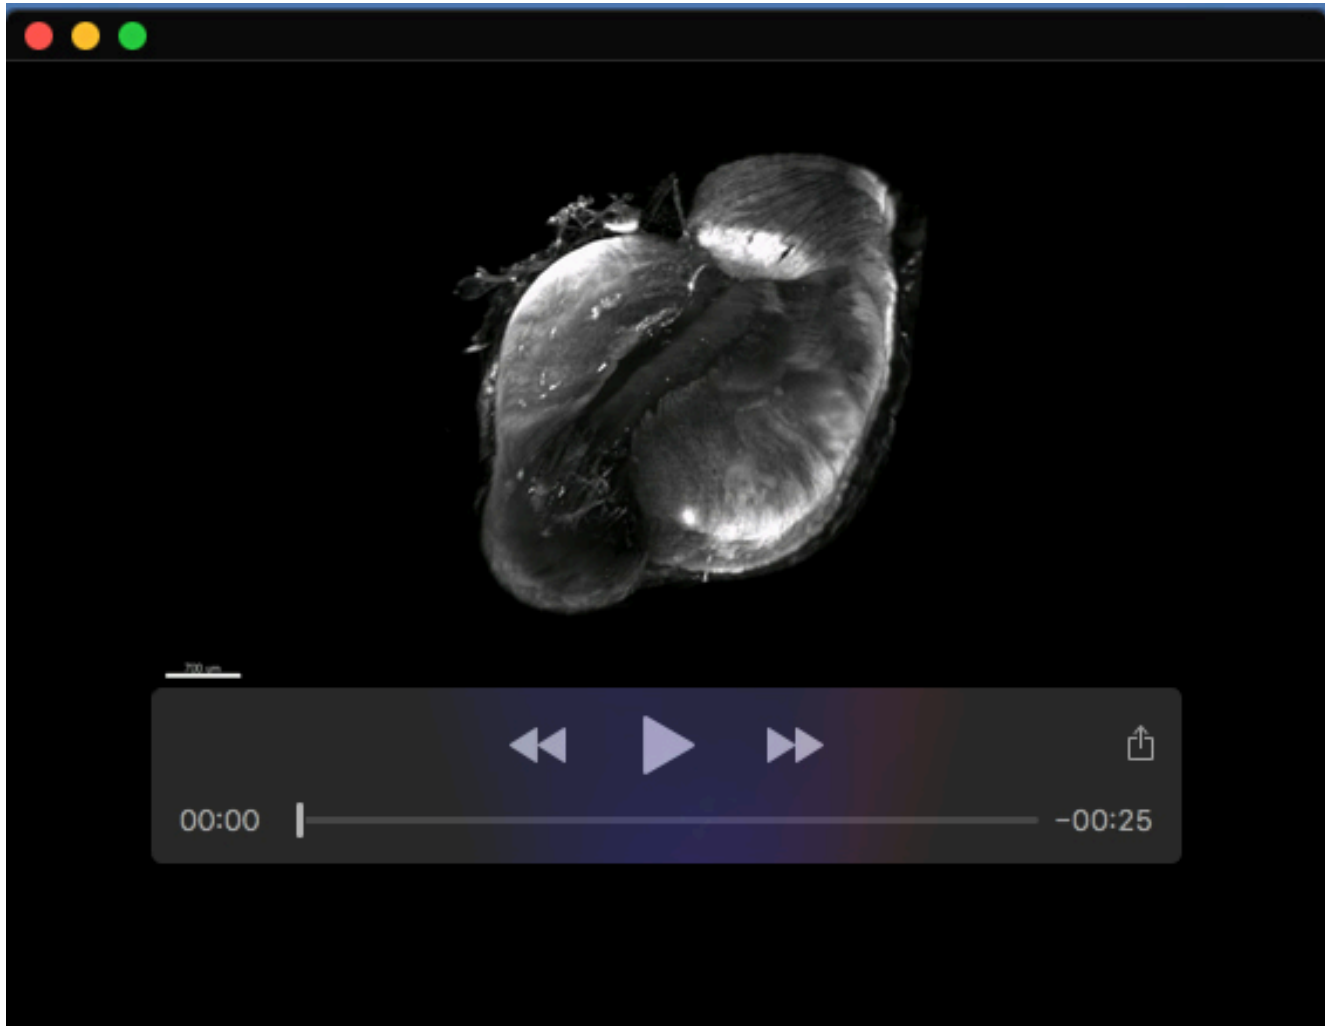

**Movie 9.** 3D *BAPX1*-overexpressing stomach smooth muscle and ENS imaging at E13 using  $\gamma$ SMA and TUJ1 immunofluorescence analysis.
